# Supplementary material
Source: publisher site journal article supplement (https://www.dovepress.com/get_supplementary_file.php?f=460864.docx)
Supplement: Supplementary file 1 [file get_supplementary_file.php]

Decrease in DD

Increase in DK

e1

Enhancement in DSE

e2

Improvement in DSMB

Figure S1 A hypothesized self-management behavioral change model

Table S1 Correlations between changes in variables at 3-month follow-up

| Variables | a | b | c | d |
| --- | --- | --- | --- | --- |
| Increase in diabetes knowledge | 1 |  |  |  |
| Decrease in diabetes distress | -0.259** | 1 |  |  |
| Enhancement in self-efficacy | 0.344*** | -0.090 | 1 |  |
| Improvements in self-management behaviors | 0.405*** | -0.275** | 0.421*** | 1 |

Note: changes in variables at 3-month follow-up = the values of variables at 3-month follow-up minus the values in baseline. a: increase in diabetes knowledge, b: decrease in diabetes distress, c: enhancement in self-efficacy; d: improvements in self-management behaviors. “**” indicates *P*<0.01, “***” indicates *P*<0.001.

Table S2 Correlations between changes in variables at 6-month follow-up

| Variables | a | b | c | d |
| --- | --- | --- | --- | --- |
| Increase in diabetes knowledge | 1 |  |  |  |
| Decrease in diabetes distress | -0.226** | 1 |  |  |
| Enhancement in self-efficacy | 0.270** | -0.390*** | 1 |  |
| Improvements in self-management behaviors | 0.210* | -0.285** | 0.428*** | 1 |

Note: changes in variables at 6-month follow-up = the values of variables at 6-month follow-up minus the values in baseline. a: increase in diabetes knowledge, b: decrease in diabetes distress, c: enhancement in self-efficacy; d: improvements in self-management behaviors. “*” indicates *P*<0.05, “**” indicates *P*<0.01, “***” indicates *P*<0.001.

Table S3 Correlations between changes in variables at 12-month follow-up

| Variables | a | b | c | d |
| --- | --- | --- | --- | --- |
| Increase in diabetes knowledge | 1 |  |  |  |
| Decrease in diabetes distress | -0.217* | 1 |  |  |
| Enhancement in self-efficacy | 0.209* | -0.389*** | 1 |  |
| Improvements in self-management behaviors | -0.033 | -0.238** | 0.424*** | 1 |

Note: changes in variables at 12-month follow-up = the values of variables at 12-month follow-up minus the values in baseline. a: increase in diabetes knowledge, b: decrease in diabetes distress, c: enhancement in self-efficacy; d: improvements in self-management behaviors. “*” indicates *P*<0.05, “**” indicates *P*<0.01, “***” indicates *P*<0.001.

Table S4 The critical ratio of parameter differences in multi-group path analysis across different follow-up points

| Group | K→SE | DDS→SE | K→DSM | DDS→DSM | SE→DSM | K↔DDS |
| --- | --- | --- | --- | --- | --- | --- |
| T0-T2 group  *vs*  T0-T1 group | -1.143 | -2.834* | -1.231 | -0.501 | -0.478 | 0.036 |
| T0-T3 group  *vs*  T0-T1 group | -1.682 | -3.008* | -3.422* | 0.736 | 0.633 | -0.270 |
| T0-T3 group  *vs*  T0-T2 group | -0.538 | -0.264 | -1.963* | 0.210 | 0.114 | -0.289 |

Note: T0-T1 group represents the changes in variables in 3-month follow-up, T0-T2 group represents the changes in variables in 6-month follow-up, T0-T3 group represents the changes in variables in 12-month follow-up; “K→SE”, “DDS→SE” represent the path coefficients from the increase in diabetes knowledge, the decrease in diabetes distress to the enhancement in diabetes self-efficacy, respectively; “K→DSM”, “DDS→DSM”, “SE→DSM” represent the path coefficients from the increase in diabetes knowledge, the decrease in diabetes distress, the enhancement in diabetes self-efficacy to the improvement in diabetes self-management behaviors, respectively. “K↔DDS” represents the correlation coefficient between the increase in diabetes knowledge and the decrease in diabetes distress. The critical value (absolute value) <1.96 between the parameters indicates that the two parameters can be considered equal, otherwise they are considered unequal and exerted significant difference. “*” indicates *P*<0.05.
